# Supplementary material for: A Highly Specific Holin-Mediated Mechanism Facilitates the Secretion of Lethal Toxin TcsL in Paeniclostridium sordellii
Source: MDPI journal article supplement (doi:10.3390/toxins14020124), 2022-02-08
Supplement: s1 [file s1]

# Supplementary Materials: A Highly Specific Holin-Mediated Mechanism Facilitates the Secretion of Lethal Toxin TcsL in *Paeniclostridium sordellii*

Callum J. Vidor, Audrey Hamiot, Jessica Wisniewski, Rommel Mathias, Bruno Dupuy, Milena Awad and Dena Lyras

Table S1. Bacterial isolates and plasmids used in this study.

| Strain/ plasmid                              | Characteristics                                                                                                                                                                              | Reference                     |
|----------------------------------------------|----------------------------------------------------------------------------------------------------------------------------------------------------------------------------------------------|-------------------------------|
| <i>P. sordellii</i>                          |                                                                                                                                                                                              |                               |
| ATCC9714                                     | Bovine, myonecrosis, contains pCS1-3, <i>tcsH-tcsL</i> <sup>+</sup>                                                                                                                          | [1]                           |
| DLL5002 [ <i>tcsLTT</i> ]                    | ATCC9714Δ <i>tcsL</i> ::TT, Em <sup>R</sup>                                                                                                                                                  | [2]                           |
| DLL5143 [pCS1-1]                             | ATCC9714 cured of pCS1-1, <i>tcsL</i> <sup>-</sup>                                                                                                                                           | This study, derived from [3]. |
| DLL5036 [ <i>tcsETT1</i> ]                   | ATCC9714Δ <i>tcsE</i> ::TT, independent mutant 1, Em <sup>R</sup>                                                                                                                            | This study                    |
| DLL5037 [ <i>tcsETT2</i> ]                   | ATCC9714Δ <i>tcsE</i> ::TT, independent mutant 2, Em <sup>R</sup>                                                                                                                            | This study                    |
| DLL5159 [ <i>tcsETT1(tcsE<sup>+</sup>)</i> ] | DLL5036(pDLL101), Em <sup>R</sup> , Tm <sup>R</sup>                                                                                                                                          | This study                    |
| DLL5240 [ <i>tcsETT1(V)</i> ]                | DLL5036(pRPF185), Em <sup>R</sup> , Tm <sup>R</sup>                                                                                                                                          | This study                    |
| <i>E. coli</i>                               |                                                                                                                                                                                              |                               |
| MC1061/ λC1857Sam7                           | Lysogenic MC1061 carrying λC1857Sam7, does not encode a functional holin                                                                                                                     | [4]                           |
| MC1061/ λCm <sup>r</sup> Δ(SR)               | Lysogenic MC1061 carrying λCm <sup>r</sup> Δ(SR), does not encode a functional holin or endolysin                                                                                            | [5]                           |
| DH5α                                         | F <sup>-</sup> φ80 <i>lacZ</i> ΔM15 Δ( <i>lacZYA-argF</i> )U169 <i>recA1 endA1 hsdR17(rk<sup>-</sup>, mk<sup>+</sup>) phoA supE44 λ<sup>-</sup> thi-1 gyrA96 relA1</i> , used for subcloning | Thermo Fisher Scientific      |
| HB101(pVS520)                                | <i>recA123</i> , Res <sup>-</sup> , Mod <sup>-</sup> , Str <sup>R</sup> containing pVS520, Tc <sup>R</sup> , used as conjugation donor for <i>P. sordellii</i>                               | [6]                           |
| <b>Plasmids</b>                              |                                                                                                                                                                                              |                               |
| pBRQ(ΔRBS)                                   | pJN4 derivative; λS gene with a deletion in its ribosome binding site (RBS) under the control of the late transcription regulatory (LTR) elements of phage λ                                 | [7]                           |
| pJN5                                         | pBR322 derivative; carries S105 under the control of the LTR elements of phage λ                                                                                                             | [8]                           |
| pRG32                                        | pBRQ(Δrbs) carrying <i>tcdE</i> with its own RBS                                                                                                                                             | [7]                           |
| pDIA6884                                     | pBRQ(Δrbs) carrying <i>tcsE</i> with its own RBS                                                                                                                                             | This study                    |
| pDIA6883                                     | pBRQ(Δrbs) carrying <i>tpeE</i> with its own RBS                                                                                                                                             | This study                    |
| pDIA6885                                     | pBRQ(Δrbs) carrying <i>tcnE</i> with its own RBS                                                                                                                                             | This study                    |
| pDLL46                                       | Clostridial TargetTron vector, contains RP4 and Tn916 <i>oriTs</i> and <i>lacZα</i> within retargeting region for blue white screening                                                       | [3]                           |
| pVS520                                       | Tra <sup>+</sup> , Mob <sup>+</sup> , RP1 derivative                                                                                                                                         | [6]                           |
| pRPF185                                      | Clostridial tetracycline inducible expression vector                                                                                                                                         | [9]                           |
| pDLL101                                      | pRPF185 carrying <i>tcsE</i> with its predicted RBS under a tetracycline inducible promoter                                                                                                  | This study                    |

Table S2. Oligonucleotide primers used in PCR.

| Primer  | Sequence (5'-3')                                              | Use                                                                                                                              |
|---------|---------------------------------------------------------------|----------------------------------------------------------------------------------------------------------------------------------|
| OBD778  | GCTCTAGATGAATATAACAATATCTTTTTATCAAAA                          | Amplify <i>tcsE</i> and predicted RBS (+) for cloning into pBRQ( $\Delta$ RBS)                                                   |
| OBD779  | CCCAAGCTTCATTATTTTATCTATCCTCAATTTTAC                          | Amplify <i>tcsE</i> and predicted RBS (-) for cloning into pBRQ( $\Delta$ RBS)                                                   |
| OBD776  | GCTCTAGAGTGGATTGAGAACTGTTTAAATTATG                            | Amplify <i>tpeE</i> and predicted RBS (+) for cloning into pBRQ( $\Delta$ RBS)                                                   |
| OBD777  | CCCAAGCTTCTAATTATTATCAATTTATTTTTATGCTTC                       | Amplify <i>tpeE</i> and predicted RBS (-) for cloning into pBRQ( $\Delta$ RBS)                                                   |
| OBD780  | GCTCTAGAATGGATAAACAGAAATATTTTAAACAC                           | Amplify <i>tcnE</i> and predicted RBS (+) for cloning into pBRQ( $\Delta$ RBS)                                                   |
| OBD781  | CCCAAGCTTGCAAGACTATTTGTCCTGCTC                                | Amplify <i>tcnE</i> and predicted RBS (-) for cloning into pBRQ( $\Delta$ RBS)                                                   |
| JRP3867 | CGAAATTAGAACTTGCCTTCAGTAAAC                                   | Targetron EBS universal                                                                                                          |
| DLP965  | AAAAAAGCTTATAATTATCCTTAAATATCCAAGCTGTGCGCCCAGATAGGGTG         | <i>tcsE</i> Targetron IBS, 161/162 antisense                                                                                     |
| DLP966  | CAGATTGTACAAATGTGGTGATAACAGATAAGTCCAAGCTATTAACCTAC-CTTTCCTTGT | <i>tcsE</i> Targetron EBS1d, 161/162 antisense                                                                                   |
| DLP967  | TGAACGCAAGTTTCTAATTTTCGGTTATATTCCGATAGAGGAAAGTGCT             | <i>tcsE</i> Targetron EBS2, 161/162 antisense                                                                                    |
| DLP525  | AAAGAGCTCCTAGGAGGCATTATGAATATAAC                              | Amplify <i>tcsE</i> and predicted RBS (+) for complementation - introduces SacI site, screening of mutants, generation of probe  |
| DLP526  | AAAGGATCCATATTTTCATTATTTTATCTATCCTC                           | Amplify <i>tcsE</i> and predicted RBS (-) for complementation - introduces BamHI site, screening of mutants, generation of probe |
| DLP968  | AAGAACTCAGCGAAACAAATGAC                                       | Internal <i>tcsL</i> (+), RT-ddPCR                                                                                               |
| DLP969  | TTACTAAACTTGGTATCCCTGCTG                                      | Internal <i>tcsL</i> (-), RT-ddPCR                                                                                               |
| DLP970  | GAAGCACAAGGACCATGTACAG                                        | Internal <i>P. sordellii</i> <i>rpoA</i> (+), RT-ddPCR                                                                           |
| DLP971  | CTTCCTTTATTACAGATATTTCCATG                                    | Internal <i>P. sordellii</i> <i>rpoA</i> (-), RT-ddPCR                                                                           |

(+) forward primer, (-) reverse primer.

## References

- Hall, I.C.; Scott, J.P. *Bacillus sordellii*, a Cause of Malignant Edema in Man. *J. Infect. Dis.* **1927**, *41*, 329–335.
- Carter, G.P.; Awad, M.M.; Hao, Y.; Thelen, T.; Bergin, I.L.; Howarth, P.M.; Seemann, T.; Rood, J.I.; Aronoff, D.M.; Lyras, D. TcsL is an Essential Virulence Factor in *Clostridium sordellii* ATCC 9714. *Infect. Immun.* **2011**, *79*, 1025–1032, doi:10.1128/iai.00968-10.
- Vidor, C.J.; Watts, T.D.; Adams, V.; Bulach, D.; Couchman, E.; Rood, J.I.; Fairweather, N.F.; Awad, M.; Lyras, D. *Clostridium sordellii* Pathogenicity Locus Plasmid pCS1-1 Encodes a Novel Clostridial Conjugation Locus. *mBio* **2018**, *9*, doi:10.1128/mBio.01761-17.
- Goldberg, A.R.; Howe, M. New Mutations in the S Cistron of Bacteriophage Lambda Affecting Host Cell Lysis. *Virology* **1969**, *38*, 200–202.
- Smith, D.L.; Young, R. Oligohistidine Tag Mutagenesis of the lambda Holin Gene. *J. Bacteriol.* **1998**, *180*, 4199–4211.

- 
6. Palombo, E.A.; Yusoff, K.; Stanisich, V.A.; Krishnapillai, V.; Willetts, N.S. Cloning and Genetic Analysis of *tra* Cistrons of the Tra 2/Tra 3 Region of Plasmid RP1. *Plasmid* **1989**, *22*, 59–69, doi:[http://dx.doi.org/10.1016/0147-619X\(89\)90036-X](http://dx.doi.org/10.1016/0147-619X(89)90036-X).
  7. Govind, R.; Dupuy, B. Secretion of *Clostridium difficile* Toxins A and B Requires the Holin-Like Protein TcdE. *PLoS Pathog.* **2012**, *8*, e1002727.
  8. Sao-Jose, C.; Santos, S.; Nascimento, J.; Brito-Madurro, A.G.; Parreira, R.; Santos, M.A. Diversity in the Lysis-Integration Region of Oenophage Genomes and Evidence for Multiple tRNA Loci, as Targets for Prophage Integration in *Oenococcus oeni*. *Virology* **2004**, *325*, 82–95, doi:10.1016/j.virol.2004.04.029.
  9. Fagan, R.P.; Fairweather, N.F. *Clostridium difficile* has Two Parallel and Essential Sec Secretion Systems. *J. Biol. Chem.* **2011**, *286*, 27483–27493, doi:10.1074/jbc.M111.263889.
